# Supplementary material for: The Genetic Architecture of Shoot and Root Trait Divergence Between Mesic and Xeric Ecotypes of a Perennial Grass
Source: Front Plant Sci. 2019 Apr 4;10:366. doi: 10.3389/fpls.2019.00366 (PMC6458277; doi:10.3389/fpls.2019.00366)
Supplement: Supplementary file 5 [file Table_1.xlsx]

## Sheet: Supplementary Table 1
Supplementary Table 1. R/qtl input file for QTL mapping of shoot and root traits of P.hallii RIL population. HH - hallii genotype, FF - filipes genotype
id	ED	LOG_ED	TN	LOG_TN	RTN	SRL	RTD	RTMASS	SHMASS	SQRT_SHMASS	RTDM	HEIGHT	LFLG	RMR	RTVOL	RTLENGTH	SLA	PC1	PC2	PC3	Chr01_251368	Chr01_1058074	Chr01_1413643	Chr01_1737120	Chr01_1945430	Chr01_2329638	Chr01_2914346	Chr01_3333550	Chr01_3470997	Chr01_3596766	Chr01_4064054	Chr01_4298581	Chr01_4421460	Chr01_4566631	Chr01_4707393	Chr01_4956451	Chr01_5258004	Chr01_5550956	Chr01_5842758	Chr01_6067356	Chr01_6438227	Chr01_7092023	Chr01_7330738	Chr01_7757997	Chr01_7866517	Chr01_8716510	Chr01_9209804	Chr01_9340283	Chr01_9585171
																					Chr01	Chr01	Chr01	Chr01	Chr01	Chr01	Chr01	Chr01	Chr01	Chr01	Chr01	Chr01	Chr01	Chr01	Chr01	Chr01	Chr01	Chr01	Chr01	Chr01	Chr01	Chr01	Chr01	Chr01	Chr01	Chr01	Chr01	Chr01	Chr01
																					0	1.00009	2.24508	3.69083	4.78902	6.30824	7.56526	9.2318	10.336	11.7656	13.4184	14.88	15.8981	17.3767	18.8591	20.3734	21.8861	23.1372	25.7404	27.0023	28.4715	30.8255	31.9008	34.3704	35.8908	38.2386	39.8936	41.5502	43.0992
1	4.802	0.991315	3.5	0.544068	5	14.1507	0.03907	0.0185	0.0748	0.273496	0.4929	9.1	11.4	0.1968	0.4875	250.91	312.73	-3.92994	-1.13538	-2.16595	HH	HH	HH	HH	HH	HH	HH	HH	HH	HH	HH	HH	HH	HH	HH	HH	HH	HH	HH	HH	HH	HH	HH	HH	HH	HH	HH	HH	HH
2	1.6667	0.823911	3.3333	0.522874	8.3333	15.1702	0.04363	0.03317	0.0819	0.286182	0.4415	11.3333	15.3	0.2938	0.7593	495.38	415.83	-2.27953	-2.46351	1.18292	FF	FF	FF	FF	FF	FF	FF	FF	FF	FF	FF	FF	FF	FF	FF	FF	FF	FH	FH	FH	FH	FH	FH	FH	FH	FH	FH	FH	FH
4	11.6667	1.22185	6.3333	0.80163	7.6667	7.8759	0.06159	0.05813	0.1755	0.418927	0.5138	12.1	16.0333	0.2468	0.9263	448.36	337.74	-0.400252	3.6499	-1.1043	HH	HH	HH	HH	HH	HH	HH	HH	HH	HH	HH	HH	HH	HH	HH	HH	HH	HH	HH	HH	HH	HH	HH	HH	HH	HH	HH	HH	HH
7	4.6667	0.985278	7.3333	0.865299	11.6667	9.9466	0.04878	0.06483	0.2065	0.454423	0.5132	18.3	17.3	0.2369	1.3293	650.03	380.84	1.55062	1.26936	0.634017	HH	HH	HH	HH	HH	HH	HH	HH	HH	HH	HH	HH	HH	HH	HH	HH	HH	HH	HH	FF	FF	FF	FF	FF	FF	FF	FF	FF	FF
15	2.3333	0.865299	7	0.845098	10.6667	11.8849	0.05234	0.06413	0.187	0.432435	0.4535	12.9667	20.1333	0.2569	1.2177	754.89	402.73	1.26523	-0.313897	1.22163	FF	FF	FF	FF	FF	FF	FF	FF	FF	FF	FF	FF	FF	FF	FF	FF	FF	FF	FF	FF	FF	FF	FF	FF	FF	FF	FF	FF	FF
19	3.6667	0.937854	6.3333	0.80163	11	11.2611	0.06146	0.049	0.1142	0.337935	0.4308	12.3667	11.8	0.324	0.7863	542.91	311.37	-0.752914	1.41194	0.717485	FF	FF	FF	FF	FF	FF	FF	FF	FF	FF	FF	FF	FF	FF	FF	FF	FF	HH	HH	HH	HH	HH	HH	HH	HH	HH	HH	HH	HH
24	17.2955	1.34822	3.5	0.544068	4	6.1154	0.07671	0.01975	0.05585	0.236326	0.5195	4.3	4.75	0.258	0.256	123.27	264.67	-4.94395	6.34615	-3.26145	FF	FF	FF	FF	FF	FF	FF	FF	FF	FF	FF	FF	FF	FF	FF	FF	FF	FF	FF	FF	FF	FF	FF	FF	FF	FF	FF	FF	FF
28	9	1.14613	9.3333	0.970035	14	10.823	0.05574	0.0919	0.2341	0.483839	0.4582	14.2	15.2667	0.2797	1.6517	980.18	382.67	3.3065	1.66064	1.72569	HH	HH	HH	HH	HH	HH	HH	HH	HH	HH	HH	HH	HH	HH	HH	HH	HH	HH	HH	HH	HH	HH	HH	HH	HH	HH	FF	FF	FF
35	7.3959	1.09328	5	0.69897	9	12.4577	0.05745	0.0648	0.2031	0.450666	0.4245	11.7	14.9	0.2419	1.128	826.36	375.35	0.708988	-0.110275	-0.416903	HH	HH	HH	HH	HH	HH	HH	HH	HH	HH	HH	HH	HH	HH	HH	HH	HH	HH	HH	HH	HH	HH	FF	FF	FF	FF	FF	FF	FF
46	5.3333	1.01424	3.6667	0.564275	5.6667	11.7216	0.05065	0.02707	0.06873	0.262164	0.4685	8.3	10.1	0.2802	0.53	312.57	369.66	-3.81528	0.294155	-0.0420659	FH	FH	FH	FH	FH	FH	FH	FH	FH	HH	HH	HH	HH	HH	HH	HH	HH	HH	HH	HH	HH	HH	HH	HH	HH	FF	FF	FF	FF
48	5.6667	1.02803	3.6667	0.564275	5	11.827	0.05132	0.03677	0.1259	0.354824	0.4596	10.4333	15.5667	0.2244	0.7097	427.41	337.59	-2.14988	-0.0767139	-1.67686	HH	HH	HH	HH	HH	HH	HH	HH	HH	HH	HH	HH	HH	HH	HH	HH	HH	HH	HH	HH	HH	HH	HH	HH	HH	HH	HH	HH	HH
51	4.6667	0.985278	5.6667	0.75333	8	12.3586	0.05453	0.0472	0.1346	0.366879	0.4361	11.9	18.1	0.265	0.864	585.59	413.23	-0.590876	-0.637759	0.559426	FF	FF	FF	FF	FF	FF	FF	FF	FF	FF	FF	FF	FF	FF	FF	FF	FF	FF	FF	FF	FF	FF	FF	FF	FF	FF	FF	FF	FF
53	1	0.778151	8.3333	0.920817	9.3333	12.9694	0.05284	0.0565	0.176	0.419524	0.4322	12.1333	12.1667	0.2488	1.062	739.89	415.46	0.257805	-0.823455	1.55376	HH	HH	HH	HH	HH	HH	HH	HH	HH	HH	HH	HH	HH	HH	HH	HH	HH	HH	HH	HH	FF	FF	FF	FF	FF	FF	FF	FF	FF
56	5	1	6.6667	0.823911	8	12.3849	0.05141	0.06843	0.1828	0.427551	0.4466	14.7667	13.9333	0.2818	1.2977	846.26	400.79	0.699758	-0.208234	1.23348	HH	HH	HH	HH	HH	HH	HH	HH	HH	FH	FH	FH	FH	FH	FH	FH	FH	FH	HH	HH	HH	FH	FH	FH	FH	FH	FH	FF	FF
58	7.3333	1.09108	6	0.778151	8.3333	10.0315	0.04982	0.04993	0.1376	0.370945	0.5186	12.3333	14.5	0.2836	1.001	482.31	377.16	-1.17022	1.79824	0.732764	FH	FH	FH	FH	FH	FH	FH	FH	FH	FH	FH	FH	FH	FH	FH	FH	FH	FH	FH	FH	FH	FH	FH	FH	HH	HH	HH	HH	HH
65	6.3333	1.05436	3.6667	0.564275	6.6667	9.4676	0.06159	0.04273	0.1153	0.339559	0.4685	10.9333	15	0.2767	0.698	406.72	362.34	-1.9859	1.75266	-0.471384	HH	HH	FF	FF	FF	FF	FF	FF	FF	FF	FF	FF	FF	FF	FF	FF	FF	FF	FF	FF	FF	FF	FF	FF	FF	FF	FF	FF	FF
66	5.3522	1.01503	7.25	0.860338	10.25	14.0457	0.05555	0.05105	0.1869	0.432319	0.407	12.925	19.225	0.2147	0.9185	693.35	359.37	1.10689	-1.25758	-0.836127	HH	HH	HH	HH	HH	HH	HH	HH	HH	HH	HH	HH	HH	HH	HH	HH	HH	HH	HH	HH	HH	HH	HH	FF	FF	FF	FF	FF	FF
67	7.8522	1.10898	6.5	0.812913	7	11.1269	0.05751	0.04858	0.1782	0.422137	0.447	16.65	14.25	0.2146	0.846	538.86	331.11	-0.0173641	0.783541	-1.79603	HH	HH	HH	HH	HH	HH	HH	HH	HH	HH	HH	FF	FF	FF	FF	FF	FF	FF	FF	FF	HH	HH	HH	HH	HH	HH	HH	HH	HH
69	10.3333	1.18564	5	0.69897	6	8.231	0.05772	0.02953	0.0829	0.287924	0.524	9.0333	12.5	0.2628	0.512	241.16	370.36	-3.29065	3.04622	-0.597753	HH	HH	HH	HH	HH	HH	HH	FF	FF	FF	FF	FF	FF	FF	FF	FF	FF	FF	FF	FF	FF	FF	FF	FF	FF	FF	FF	FF	FF
70	10.6667	1.19498	4.6667	0.66901	6	10.2532	0.05689	0.04343	0.09083	0.30138	0.4773	9.3	11.9	0.3198	0.79	460.67	334.13	-2.47476	2.23356	-0.121186	HH	HH	HH	HH	HH	HH	HH	HH	HH	HH	HH	HH	HH	HH	HH	HH	HH	HH	HH	HH	HH	HH	HH	HH	HH	HH	HH	HH	HH
73	4	0.954243	4.3333	0.636819	9	12.7241	0.05796	0.05817	0.1677	0.409512	0.4214	18.5667	18.6667	0.2558	1.0323	742.15	374.51	0.947815	-0.801824	-0.446381	HH	HH	HH	HH	HH	HH	HH	HH	HH	HH	HH	HH	HH	FF	FF	FF	FF	FF	FF	FF	FF	FH	HH	HH	HH	HH	FH	FH	FH
75	3	0.90309	6.6667	0.823911	9	12.245	0.04784	0.05053	0.07747	0.278334	0.4678	5.0667	9.4667	0.3945	1.04	607.39	411.96	-2.47554	0.599951	4.08822	HH	HH	HH	HH	HH	HH	HH	HH	HH	HH	HH	HH	HH	HH	HH	HH	HH	HH	HH	HH	HH	HH	HH	HH	HH	HH	HH	HH	HH
79	6.6667	1.06695	9.6667	0.985278	10	11.1614	0.05372	0.1024	0.3198	0.565509	0.4698	15.7333	17.3333	0.2412	1.7997	996.57	347.57	3.93671	1.40761	0.559392	HH	HH	HH	HH	HH	HH	FF	FF	FF	FF	FF	FF	FF	FF	FF	FF	FF	FF	FF	FF	FF	FF	FF	FF	FF	FF	FF	FF	FF
83	6	1.04139	5.3333	0.726996	8.6667	14.9635	0.0576	0.0533	0.1975	0.44441	0.3863	11.9333	17.5333	0.2153	0.9247	803.37	347.33	0.79971	-1.71698	-1.49201	FF	FF	FF	FF	FF	FF	FF	FF	FF	FF	FF	FF	FF	FF	FF	HH	HH	HH	HH	HH	HH	HH	HH	HH	HH	HH	HH	HH	HH
84	6.6667	1.06695	5	0.69897	9.6667	11.1761	0.05789	0.0609	0.1897	0.435546	0.4489	16.6667	16.2	0.2471	1.063	676.73	354.22	0.822208	0.667546	-0.71006	HH	HH	HH	HH	HH	HH	HH	HH	HH	HH	HH	HH	HH	HH	HH	HH	HH	HH	HH	HH	HH	HH	HH	HH	HH	HH	HH	HH	HH
89	3.3333	0.920817	7.3333	0.865299	11.6667	12.317	0.05422	0.07967	0.1793	0.423438	0.4399	12.2333	18.4	0.3105	1.487	977.29	413.71	1.9465	-0.0763617	2.58089	FH	FH	FH	FH	FH	FH	HH	HH	HH	HH	HH	HH	HH	HH	HH	HH	HH	HH	HH	HH	HH	HH	HH	HH	HH	HH	FF	FF	FF
90	4	0.954243	6.6667	0.823911	9.6667	15.0799	0.0588	0.04853	0.1842	0.429185	0.379	15.3333	16.6	0.2089	0.8253	732.22	342.34	1.05306	-1.86368	-1.40382	HH	HH	HH	HH	FF	FF	FF	FF	FF	FF	FF	FF	FF	FF	FF	FF	FF	FF	FF	FF	FF	FF	FF	FF	FF	FF	FF	FF	FF
95	10.2955	1.18456	8	0.90309	7.5	11.0919	0.05641	0.05505	0.1825	0.4272	0.4664	15.35	16	0.2385	0.9755	578.4	360.5	0.423951	1.23923	-0.791969	HH	HH	HH	HH	HH	FF	FF	FF	FF	FF	FF	FF	FF	FF	FF	FF	FF	FF	FF	FF	FF	FF	HH	HH	HH	HH	HH	HH	HH
96	7.1022	1.08286	5.25	0.720159	8.75	13.376	0.05556	0.04278	0.1565	0.395601	0.4153	10.1	16.275	0.2151	0.7675	566.51	303.48	-0.460238	-0.456892	-2.06241	FF	FF	FF	FF	FF	FF	FF	FF	FF	FF	HH	HH	HH	HH	HH	HH	HH	HH	HH	HH	HH	HH	HH	HH	HH	HH	HH	HH	HH
99	6.6667	1.06695	8.3333	0.920817	11.6667	11.2359	0.05013	0.05267	0.1536	0.391918	0.4759	8.6667	11.2	0.2617	1.047	592.45	357.92	-0.345956	1.26256	0.973836	FH	FH	FH	FH	FH	FH	FH	FH	FH	FH	FH	FH	FH	FH	HH	HH	HH	HH	HH	HH	HH	HH	HH	HH	HH	HH	HH	HH	FH
100	6	1.04139	4.3333	0.636819	9	13.7834	0.054	0.05593	0.2248	0.474131	0.4161	19.6667	22.1	0.2012	1.033	774.63	380.22	1.83078	-1.83401	-1.69218	HH	HH	HH	HH	HH	HH	HH	HH	HH	HH	HH	HH	HH	HH	HH	HH	HH	HH	HH	HH	HH	HH	HH	HH	HH	HH	HH	HH	HH
102	4.6667	0.985278	5.3333	0.726996	9	14.2652	0.05379	0.07327	0.2456	0.49558	0.4086	19.2667	24.2667	0.2322	1.361	1045.26	393.2	3.10561	-2.06685	-0.459992	HH	HH	HH	HH	HH	HH	HH	HH	HH	HH	HH	HH	HH	HH	HH	HH	HH	HH	HH	HH	HH	HH	HH	FF	FF	FF	FF	FF	FF
105	7.3333	1.09108	3.6667	0.564275	8.3333	14.8757	0.05052	0.03997	0.1524	0.390384	0.4168	17.2667	16.8667	0.2044	0.7783	565.12	373.24	-0.249249	-2.16405	-1.93932	HH	HH	HH	HH	HH	HH	HH	HH	HH	HH	HH	HH	HH	HH	HH	HH	HH	HH	HH	HH	HH	HH	HH	HH	HH	HH	HH	HH	HH
106	5.4024	1.01713	3.5	0.544068	6	12.0375	0.04611	0.0329	0.0962	0.310161	0.4806	11.95	11.05	0.2553	0.7115	400.95	422.69	-2.94925	-0.519164	0.257092	HH	HH	HH	HH	HH	HH	HH	HH	HH	HH	HH	HH	HH	HH	HH	HH	HH	HH	HH	HH	HH	HH	HH	HH	HH	HH	HH	HH	HH
107	4.3333	0.970035	6.3333	0.80163	10	10.6503	0.05713	0.05017	0.1567	0.395854	0.4597	12.2333	15.7667	0.2475	0.8997	539.31	363.95	-0.197134	0.918615	0.0477058	HH	HH	HH	HH	HH	HH	HH	HH	HH	HH	HH	HH	HH	HH	HH	HH	HH	HH	HH	HH	HH	HH	HH	HH	HH	HH	HH	HH	HH
108	9.6667	1.16633	8	0.90309	7.3333	11.1482	0.05754	0.04223	0.1119	0.334515	0.4469	8.3667	13.2	0.272	0.7267	460.2	414.45	-1.53994	0.94575	0.694079	HH	HH	HH	HH	HH	HH	HH	FH	FH	FH	FH	FH	FH	FH	HH	HH	HH	HH	HH	FF	FF	FF	FF	FF	FF	FF	FF	FF	FF
110	13	1.25527	6	0.778151	8.3333	10.6789	0.05178	0.06467	0.2136	0.462169	0.4807	17.5	18.5	0.23	1.2493	684.97	351.91	1.33771	1.25325	-1.44411	HH	HH	HH	HH	HH	HH	HH	HH	HH	HH	FF	FF	FF	FF	FF	FF	FF	FF	FF	FF	FF	FF	FF	FF	FF	FF	FF	FF	FF
113	3.6667	0.937854	5.6667	0.75333	8.6667	13.1608	0.05062	0.03227	0.0788	0.280713	0.4404	9.2	11.0667	0.291	0.6377	421.33	416.03	-2.53776	-0.790927	1.39853	HH	HH	HH	HH	HH	HH	HH	HH	HH	HH	HH	HH	HH	HH	HH	HH	HH	HH	HH	HH	HH	HH	HH	HH	HH	HH	HH	HH	HH
115	2.6667	0.884608	5	0.69897	7.6667	13.1117	0.04399	0.036	0.09153	0.302539	0.4717	7.1667	13.9333	0.2844	0.806	460.94	460.4	-2.66961	-1.26706	2.10428	HH	HH	HH	HH	HH	HH	HH	HH	HH	HH	HH	HH	HH	HH	HH	HH	HH	HH	HH	HH	HH	HH	HH	HH	HH	HH	HH	HH	HH
117	8	1.11394	6	0.778151	8.3333	11.8168	0.05837	0.0615	0.1936	0.44	0.4327	13.1667	15.0667	0.2407	1.042	703.71	329.72	0.577571	0.660747	-1.11671	HH	HH	HH	HH	HH	HH	HH	HH	HH	HH	HH	HH	HH	HH	HH	HH	HH	HH	HH	HH	HH	HH	HH	HH	HH	FF	FF	FF	FF
120	4.6667	0.985278	5.3333	0.726996	5.3333	11.9986	0.04732	0.02923	0.08293	0.287976	0.4779	8.9	10.9333	0.2556	0.6137	334.44	353.04	-3.28384	0.167005	-0.283954	HH	HH	HH	HH	HH	HH	HH	HH	HH	HH	HH	HH	HH	FH	FH	FH	FH	FH	FH	FH	FH	FH	FH	FH	HH	HH	HH	HH	HH
131	18.3333	1.36798	5.3333	0.726996	5.3333	7.3301	0.06623	0.02653	0.08397	0.289776	0.5127	6.4	10.0333	0.2431	0.4	194.7	320.54	-3.51925	4.71322	-2.49383	HH	HH	HH	HH	HH	HH	HH	HH	HH	HH	HH	HH	HH	HH	HH	HH	HH	HH	HH	HH	HH	HH	HH	HH	HH	HH	HH	FF	FF
132	5.3333	1.01424	5.3333	0.726996	8.6667	13.1677	0.05024	0.0398	0.0986	0.314006	0.4445	7.5333	12.9667	0.2919	0.7913	517.57	397.49	-2.03077	-0.5247	1.09905	HH	HH	HH	HH	HH	HH	HH	HH	HH	HH	HH	HH	HH	HH	HH	HH	HH	HH	HH	HH	HH	HH	HH	HH	HH	HH	HH	HH	HH
137	13.6667	1.27107	7	0.845098	9	12.8873	0.05435	0.05217	0.1651	0.406325	0.428	13.8333	14.8	0.2409	0.986	672.4	433.15	0.373905	-0.333137	-0.198077	HH	HH	HH	HH	HH	HH	HH	HH	HH	HH	HH	HH	HH	HH	HH	HH	HH	HH	HH	HH	HH	HH	HH	HH	HH	HH	HH	FF	FF
144	5.3959	1.01686	3	0.477121	5	13.0728	0.05382	0.0493	0.2099	0.458148	0.4284	15.5	18.9	0.1902	0.916	659.02	351.26	-0.0316693	-1.31586	-2.51138	FF	FF	FF	FF	FF	FF	FF	FF	FF	FF	FF	FF	FF	FF	FF	FF	FF	FF	HH	HH	HH	HH	HH	HH	HH	FF	FF	FF	FF
145	7.3333	1.09108	7.3333	0.865299	8.6667	11.7892	0.05357	0.04253	0.1194	0.345543	0.4503	8.8333	12.9333	0.2637	0.798	501.4	364	-1.29052	0.636441	0.233848	FF	FF	FF	FF	FF	FF	FF	FF	FF	FF	FF	FF	FF	FF	FF	FF	FF	FF	FF	FF	FF	FF	FF	FF	FF	FF	FF	FF	FF
151	3.3959	0.924067	5	0.69897	6	9.6666	0.06184	0.0235	0.0598	0.24454	0.4624	4.4	10.6	0.2821	0.38	234.09	376.78	-4.06583	1.65119	0.424925	FF	FF	FF	FF	FF	FF	FF	FF	FF	FF	FF	FF	FF	FF	FF	FF	FF	FF	FF	FF	FF	FF	FF	FF	FH	FH	FH	FH	FH
159	5.7955	1.03324	4	0.60206	3.5	13.7741	0.04486	0.0202	0.09085	0.301413	0.4745	11.05	12	0.1794	0.4515	249.09	366.1	-3.56529	-1.33121	-2.19211	FH	FH	FH	FH	FH	FH	FH	HH	HH	HH	HH	HH	HH	HH	HH	HH	HH	HH	HH	HH	HH	HH	HH	HH	HH	HH	HH	HH	HH
160	6.3333	1.05436	6.3333	0.80163	8.3333	11.3077	0.0578	0.0846	0.205	0.452769	0.4412	13.0333	16.7	0.3371	1.448	924.8	342.4	1.44567	1.29232	1.28833	HH	HH	HH	HH	HH	HH	HH	HH	HH	HH	FH	FH	FH	FH	FH	FH	FH	FH	FH	FH	FH	FH	FH	FH	FH	FH	FH	FH	FH
180	4.3333	0.970035	4.6667	0.66901	6.3333	14.3219	0.04971	0.0327	0.1024	0.32	0.4266	9.0333	13.4333	0.245	0.6553	461.5	369.97	-2.32666	-1.53148	-0.527912	FF	FF	FF	FF	FF	FF	FF	FF	FF	FF	FF	FF	FF	FF	FF	FF	FF	FF	FF	FF	FF	FF	FF	FF	FF	FF	FF	FF	FF
181	3.3333	0.920817	7	0.845098	10.3333	13.3958	0.05588	0.06453	0.1769	0.420595	0.4128	13.3667	15.6333	0.268	1.1573	861.43	400.07	1.15729	-0.920379	1.13841	FF	FF	FF	FF	FF	FF	FF	FF	FF	FF	FF	FF	FF	FF	FF	FF	FF	FF	FF	FF	FF	FF	FF	FF	FF	FF	FF	FF	FF
183	6	1.04139	8	0.90309	11.6667	10.0879	0.05807	0.09697	0.2375	0.48734	0.4656	13.1	18.6333	0.2908	1.6783	976.52	366.17	3.03217	1.90057	1.59745	FF	FF	FF	FF	FF	FF	FF	FF	FH	FH	FH	FF	FF	FF	FF	FF	FF	FF	FF	FF	FF	FF	FF	FF	FF	FF	FF	FF	FF
187	4	0.954243	5.3333	0.726996	10.3333	12.5455	0.04861	0.04237	0.1393	0.373229	0.4586	11.4667	14.3333	0.231	0.8647	526.14	360.22	-0.838646	-0.436584	-0.252478	HH	HH	HH	HH	HH	HH	HH	HH	HH	HH	HH	HH	HH	HH	HH	HH	HH	HH	HH	HH	HH	HH	HH	HH	HH	HH	HH	HH	HH
190	2.6667	0.884608	4.6667	0.66901	8	14.801	0.04499	0.04443	0.1259	0.354824	0.4379	12.1667	16.8333	0.2595	0.9803	658.82	405.84	-0.868124	-2.24875	0.620466	HH	HH	HH	HH	HH	HH	HH	HH	HH	HH	HH	HH	HH	HH	HH	HH	HH	HH	HH	HH	HH	HH	HH	HH	HH	HH	HH	HH	HH
201	6	1.04139	4.3333	0.636819	7	9.7034	0.05519	0.0432	0.117	0.342053	0.4924	12.9667	13.9	0.2711	0.7733	440.57	374.66	-1.84473	1.51303	-0.0582148	FF	FF	FF	FF	FF	FF	FF	FF	FF	FF	FF	FF	FF	FF	FF	FF	FF	FF	FF	FF	FF	HH	HH	HH	HH	HH	HH	HH	HH
202	5.6667	1.02803	6.3333	0.80163	8	10.3973	0.06443	0.07253	0.159	0.398748	0.4373	11	14	0.318	1.1147	742.21	404.83	0.0924103	1.48277	1.65957	FF	FF	FF	FF	FF	FF	FF	FF	FF	FF	FF	FF	FF	FF	FF	FF	FF	FF	FF	FF	FF	FF	FF	FF	FF	FF	FF	FF	FF
206	4.6667	0.985278	7.3333	0.865299	10.3333	12.8065	0.04738	0.0685	0.2272	0.476655	0.4593	14.2	19.7	0.2324	1.456	880.1	392.46	2.06022	-0.71404	0.617088	FF	HH	HH	HH	HH	HH	HH	HH	HH	HH	HH	HH	HH	HH	HH	HH	HH	HH	HH	HH	HH	HH	HH	HH	HH	HH	HH	HH	HH
208	12.2955	1.23793	3	0.477121	2.5	16.3247	0.03772	0.0116	0.0291	0.170587	0.4604	5.65	9.6	0.2836	0.308	189.26	403.82	-5.60761	-2.11009	-0.622449	HH	HH	HH	HH	HH	HH	HH	HH	HH	HH	HH	HH	HH	HH	HH	HH	HH	HH	HH	HH	HH	HH	HH	HH	HH	HH	HH	HH	HH
213	4.6667	0.985278	5.6667	0.75333	7.3333	11.5857	0.04929	0.03927	0.1081	0.328786	0.4885	8.8333	16.8667	0.2657	0.8163	457.26	429.54	-1.9182	0.0181533	1.10334	FH	FH	FH	FF	FF	FF	FF	FF	FF	FF	FF	FF	FF	FF	FF	FF	FF	FF	FF	FF	FF	FF	FF	FF	FF	HH	HH	HH	HH
220	13.7955	1.27405	6.5	0.812913	12.5	10.0373	0.05731	0.07845	0.2494	0.4994	0.4679	17.35	22.1	0.2397	1.377	795.6	362.73	3.11542	1.76101	-0.88916	HH	HH	HH	HH	HH	HH	HH	HH	HH	HH	HH	HH	HH	HH	HH	HH	HH	HH	FF	FF	FF	FF	FF	FF	FF	FF	FF	FF	HH
236	4	0.954243	10	1	12	12.595	0.05765	0.075	0.2671	0.516817	0.4183	17.8	16.9667	0.2189	1.309	940.42	395.9	3.42903	-0.402565	0.637377	FF	HH	HH	HH	HH	HH	HH	HH	HH	HH	HH	HH	HH	HH	HH	HH	HH	HH	HH	HH	HH	HH	HH	HH	HH	HH	HH	FH	FH
239	6.6667	1.06695	5.3333	0.726996	7.6667	12.0481	0.05058	0.05723	0.1908	0.436807	0.459	14.2	18.5667	0.2334	1.1293	681.53	367.07	0.44099	-0.184398	-0.691641	HH	HH	HH	HH	HH	HH	HH	HH	HH	HH	HH	HH	HH	HH	HH	HH	HH	HH	HH	HH	HH	HH	HH	FF	FF	FF	FF	FF	FF
247	4.6667	0.985278	6.3333	0.80163	9.6667	11.6704	0.05349	0.05167	0.1403	0.374566	0.4555	10.9	13.9	0.2737	0.9523	590.07	374.04	-0.60704	0.449565	0.761953	HH	HH	HH	HH	HH	HH	HH	HH	HH	HH	HH	HH	FH	FH	FH	FH	FH	FH	FH	FH	FH	FH	FH	FF	FF	FF	FF	FF	FF
252	14.6667	1.29373	8.3333	0.920817	11.3333	14.0203	0.05461	0.06857	0.234	0.483735	0.4091	13.6	20.1	0.2265	1.2707	960.3	372.57	2.887	-0.518445	-0.926163	HH	HH	HH	HH	HH	HH	FF	FF	FF	FF	FF	FF	FF	FF	FF	FF	FF	FF	FF	FF	FF	HH	HH	HH	HH	HH	HH	HH	HH
256	12.6667	1.24716	10	1	14.6667	9.3281	0.05824	0.1149	0.3906	0.62498	0.4906	21.1	19.1667	0.2266	1.9703	1042.6	350.82	6.22177	2.98875	-0.0207792	FF	FF	FF	FF	FF	FF	FF	FF	FF	FF	FF	FF	FF	HH	HH	HH	HH	HH	HH	HH	HH	HH	HH	HH	HH	HH	HH	HH	HH
258	5.6667	1.02803	6.6667	0.823911	7	10.9025	0.05131	0.03927	0.1095	0.330908	0.4873	6.6333	11.4333	0.2594	0.776	402.47	305	-2.36771	1.62324	-0.404774	FF	FF	FF	FF	FF	FF	FF	FF	FF	FF	FF	FF	FF	FF	FF	FF	FF	FF	FF	FF	FF	FF	FF	FF	FF	FF	HH	HH	HH
266	2	0.845098	6.6667	0.823911	9	10.9229	0.05419	0.0545	0.1292	0.359444	0.4667	11.8	17.6667	0.3004	1.0033	606.9	453.59	-0.47216	0.162215	2.48897	HH	HH	HH	HH	HH	HH	HH	HH	HH	HH	HH	HH	HH	HH	FF	FF	FF	FF	FF	FF	FF	FF	FF	FF	FF	FF	FF	FF	FF
270	4.6667	0.985278	7.6667	0.884608	9.3333	10.9637	0.04744	0.0485	0.1576	0.396989	0.4996	12.3	16.0667	0.236	1.0217	541.98	337.21	-0.25204	0.985394	-0.0384206	HH	HH	HH	HH	HH	HH	HH	HH	HH	HH	HH	HH	HH	HH	HH	HH	HH	HH	HH	FF	FF	FF	FF	FF	FF	FF	FF	HH	HH
277	6	1.04139	8.3333	0.920817	10.3333	13.0902	0.05553	0.0752	0.2412	0.491121	0.4183	15.5667	17.8667	0.2372	1.347	980.79	421.13	2.70174	-0.82872	0.812175	HH	HH	HH	HH	HH	HH	HH	HH	HH	HH	HH	HH	HH	HH	HH	HH	HH	HH	HH	HH	HH	HH	HH	HH	HH	HH	HH	HH	HH
280	3.3333	0.920817	5.6667	0.75333	9.6667	10.7327	0.04895	0.04417	0.1109	0.333017	0.4926	9.2	14.4	0.2929	0.9053	475.04	406.77	-1.68904	0.721505	1.76486	HH	HH	HH	HH	HH	HH	HH	HH	HH	HH	HH	HH	HH	HH	HH	HH	HH	HH	HH	HH	HH	HH	HH	HH	HH	HH	HH	HH	HH
281	4.6667	0.985278	6.6667	0.823911	11	13.4845	0.0566	0.0804	0.2296	0.479166	0.419	15.1	16.9333	0.2652	1.3917	964.31	438.84	2.35742	-0.986069	1.50837	FF	FF	FF	FF	FF	FF	FF	FF	FF	FF	FF	FF	FF	FF	FF	FF	FF	FF	FF	FF	FF	HH	HH	HH	HH	HH	HH	HH	HH
285	8.6667	1.13566	4.3333	0.636819	8.3333	12.1407	0.05647	0.04917	0.1369	0.37	0.4326	12.8	16.9667	0.2655	0.8713	595.26	379.33	-0.52336	-0.0448189	-0.524071	FF	FF	FF	FF	FF	FF	FF	FF	FF	FF	FF	FF	FF	FF	FF	HH	HH	HH	HH	HH	HH	HH	HH	HH	HH	HH	HH	HH	HH
288	13.3333	1.26324	6.3333	0.80163	10.3333	13.7954	0.05256	0.06393	0.2616	0.511468	0.4153	15.0667	16.4667	0.1964	1.217	885.65	349.41	2.23528	-0.650888	-2.01079	HH	HH	HH	HH	HH	HH	HH	HH	HH	HH	HH	HH	HH	HH	HH	HH	HH	HH	HH	HH	HH	HH	HH	HH	HH	HH	HH	HH	HH
298	8.3333	1.12494	5	0.69897	7	11.6482	0.05302	0.044	0.1296	0.36	0.456	12.2333	14.6333	0.2636	0.8277	518.57	367.13	-1.30266	0.39913	-0.502344	FH	FH	FH	FH	FH	FF	FF	FF	FF	FF	FF	FF	FF	FF	FF	FF	FF	FF	FF	FF	FF	FF	FF	FF	FF	FF	FF	FF	FF
299	14	1.27875	7.3333	0.865299	8	8.4056	0.06527	0.04207	0.1249	0.353412	0.4841	6.3667	8.7	0.2521	0.652	350.24	342.72	-2.06017	3.84568	-0.909399	FF	FF	FF	FF	FF	FF	FF	FF	FF	FF	FF	FF	FF	FF	FF	FF	FF	FF	FF	FF	FF	FF	FF	FF	FF	FF	FF	FF	FF
303	11	1.20412	3.6667	0.564275	6.6667	15.0854	0.04454	0.02487	0.1041	0.322645	0.4402	10.9667	13.8	0.1973	0.5527	360.69	329.45	-2.39411	-1.60346	-2.81196	HH	HH	HH	HH	HH	HH	HH	HH	HH	HH	HH	HH	HH	HH	HH	HH	HH	HH	HH	HH	HH	FF	FF	FF	FF	FF	FF	FF	FF
304	17.4089	1.35042	12	1.07918	9	12.7141	0.04472	0.0305	0.0926	0.304302	0.4715	9.3	11.2	0.2478	0.682	381.42	432.92	-1.42076	0.570559	0.690438	HH	HH	HH	HH	HH	HH	HH	HH	HH	HH	HH	HH	HH	HH	HH	HH	HH	HH	HH	FF	FF	FF	FF	FF	FF	FF	FF	FF	FF
311	4.6667	0.985278	7	0.845098	10	12.9982	0.05038	0.0655	0.1904	0.436348	0.4412	14.9	16.9333	0.2553	1.2963	849.98	378.33	1.42246	-0.625879	0.61495	HH	HH	HH	HH	HH	HH	HH	HH	HH	FH	FH	FF	FF	FF	FF	FF	FF	FF	FF	FF	FF	FF	FF	FF	FF	FF	FF	FF	FF
312	7.3333	1.09108	4.6667	0.66901	9.6667	13.2042	0.05572	0.0578	0.2009	0.448219	0.4161	16.4	23.3333	0.2237	1.0343	761.23	361.99	1.66748	-1.11185	-1.45382	FF	FF	FF	FF	FF	FF	FF	FF	FF	FF	FF	FF	FF	FF	FF	FF	FF	FF	FF	FF	FF	FF	FF	HH	HH	FF	FF	FF	FF
314	5.3333	1.01424	4.3333	0.636819	6.6667	11.841	0.05273	0.02777	0.0757	0.275136	0.4596	7.2	10.5333	0.2729	0.566	331.58	452.86	-3.51879	-0.246871	1.09269	HH	HH	HH	HH	HH	HH	HH	HH	HH	HH	HH	HH	HH	HH	HH	HH	HH	HH	HH	HH	HH	HH	HH	HH	HH	HH	HH	HH	HH
317	10.2955	1.18456	4.5	0.653213	10.5	12.5304	0.05877	0.08705	0.3031	0.550545	0.4175	23.65	20.2	0.2217	1.4815	1089.1	338.68	4.19479	-0.185072	-1.97203	FF	FF	FF	FF	FF	FF	FF	FF	FF	FF	FF	FF	FF	FF	FF	FF	FF	FF	FF	FF	FF	FH	FH	HH	HH	HH	HH	HH	HH
318	3.2955	0.918843	6.5	0.812913	10.5	13.2987	0.04736	0.05395	0.1515	0.38923	0.4528	11	15.75	0.2662	1.14	717	494.51	-0.0679708	-1.54446	2.5706	HH	HH	HH	HH	HH	HH	HH	HH	HH	HH	HH	HH	HH	HH	HH	HH	HH	HH	HH	HH	HH	HH	HH	HH	HH	HH	HH	HH	HH
319	3.3333	0.920817	8	0.90309	12.6667	14.4789	0.05523	0.0889	0.2692	0.518845	0.4	16.9333	23.1667	0.25	1.6107	1293.63	371.08	4.69226	-1.54786	0.763172	HH	HH	HH	HH	HH	HH	HH	HH	HH	HH	HH	HH	HH	HH	HH	HH	HH	HH	HH	HH	HH	HH	HH	HH	FF	FF	FF	FF	FF
320	6	1.04139	4.3333	0.636819	9	9.4686	0.05356	0.04193	0.1451	0.38092	0.505	11.1	14.2667	0.2244	0.782	400.6	352.48	-1.50409	1.6899	-0.874267	HH	HH	HH	HH	HH	HH	HH	HH	HH	HH	HH	HH	HH	HH	HH	HH	HH	HH	HH	HH	HH	HH	HH	HH	HH	HH	HH	HH	HH
323	5	1	5	0.69897	8.3333	11.6817	0.05295	0.04517	0.1394	0.373363	0.4548	11.8	15.2	0.2463	0.854	525.68	354.14	-0.969884	0.172595	-0.4923	FF	FF	FF	FF	FF	FF	FF	FF	FF	FF	FF	FF	FF	FF	FF	FF	FF	FF	FF	FF	FF	FF	FF	FF	FF	FF	FF	FF	FF
324	6.6667	1.06695	7.3333	0.865299	12.3333	13.292	0.06423	0.08423	0.2744	0.523832	0.3834	21.1	17.6667	0.2345	1.3217	1123.18	428.3	4.15864	-0.99678	0.328224	HH	HH	FF	FF	FF	FF	FF	FF	FF	FF	FF	FF	FF	FF	FF	FF	FF	FF	FF	FF	FF	HH	HH	HH	HH	HH	HH	HH	HH
325	9.6667	1.16633	5.6667	0.75333	8.3333	11.5573	0.05292	0.04233	0.1237	0.35171	0.4573	10	12.7667	0.2574	0.797	482.38	391.6	-1.50594	0.549201	-0.0806413	FF	FF	FF	FF	FF	FF	FF	FF	FF	FF	FF	HH	HH	HH	HH	HH	HH	HH	HH	HH	HH	HH	HH	HH	HH	HH	HH	HH	HH
332	9	1.14613	4	0.60206	7.6667	11.2172	0.04843	0.0323	0.08007	0.282966	0.4892	5.9667	11.0333	0.287	0.6673	356.85	369.45	-3.36561	1.04649	0.186936	HH	HH	HH	HH	HH	HH	FF	FF	FF	FF	FF	FF	FF	FF	FF	FF	FF	FF	FF	FF	FF	FF	FF	FF	FF	FF	FF	FF	FF
333	4.1022	0.959146	5.75	0.759668	8.75	12.6169	0.05258	0.06255	0.1809	0.425323	0.4395	13.85	17.9	0.2548	1.1727	784.8	418.47	0.73864	-0.856119	0.785538	FH	FH	FH	FH	FH	HH	HH	HH	HH	HH	HH	HH	HH	HH	FH	FH	FH	FH	FH	FH	FH	FH	FH	FF	FF	FF	FF	FF	FF
334	10	1.17609	5.6667	0.75333	7.6667	12.1543	0.04913	0.0444	0.1459	0.381969	0.4681	13.5	16.8667	0.2354	0.8913	502.74	400.76	-0.710262	-0.137753	-0.573052	HH	HH	FF	FF	FF	FF	FF	FF	FF	FF	FF	FF	FF	FF	FF	FF	FF	FF	FF	FF	FF	FF	FF	FF	FF	FF	FF	FF	FF
337	4.6667	0.985278	4.3333	0.636819	8.6667	14.0389	0.05112	0.0402	0.1303	0.360971	0.4232	14.0667	21.2333	0.2365	0.7877	564.34	455.81	-0.408151	-2.37816	0.182047	FF	FF	FF	FF	FF	FF	FF	FF	FF	FF	FF	FF	FF	FF	FF	FF	FF	FF	FF	FF	FF	FF	FF	FF	HH	HH	HH	HH	HH
355	1.6667	0.823911	7	0.845098	10	12.8744	0.05133	0.05267	0.1676	0.40939	0.4443	12.8	12.5	0.2384	1.0087	669.14	391.2	-0.012196	-0.692189	0.796369	HH	HH	HH	HH	HH	HH	HH	HH	HH	HH	HH	HH	HH	HH	HH	HH	HH	HH	HH	HH	HH	HH	HH	HH	HH	HH	HH	HH	HH
356	13.4024	1.26487	4.5	0.653213	10.5	11.7538	0.05093	0.09585	0.3091	0.555968	0.4607	19.1	23.05	0.2364	1.8885	1126.19	345.29	4.30442	0.535953	-1.3187	FF	FF	FF	FF	FF	FF	FF	FF	FF	FF	FF	FF	FF	FF	FF	FF	FF	FF	FF	FF	FF	FF	FF	FF	FF	FF	FF	FF	FF
357	12	1.23045	6	0.778151	9.6667	11.3114	0.04957	0.05143	0.1324	0.363868	0.4803	10.2667	12.4333	0.2792	1.037	571.31	378.93	-0.910236	1.23009	0.351729	HH	HH	HH	HH	HH	HH	HH	HH	HH	HH	HH	HH	HH	HH	HH	HH	HH	HH	FF	FF	FF	FF	FF	FF	FF	FF	FF	FF	FF
360	13.9024	1.27652	14.5	1.16137	15	10.1941	0.05743	0.1609	0.4744	0.688767	0.4697	21.6	16.85	0.2536	2.9055	1640.88	360.82	9.71335	3.20671	1.94063	FH	FH	FH	FH	FH	FF	FF	HH	HH	HH	HH	HH	HH	HH	HH	HH	HH	HH	FF	FF	FF	FF	FF	FF	FF	FF	FF	FF	FF
363	4.3333	0.970035	5.3333	0.726996	8	12.5237	0.05079	0.0351	0.08863	0.297708	0.4484	10.1	12.9333	0.2858	0.69	437.42	429.93	-2.28995	-0.643233	1.29406	HH	HH	HH	HH	HH	HH	HH	HH	HH	HH	HH	HH	HH	HH	HH	HH	HH	HH	FF	FF	FF	FF	FF	FF	FF	FF	HH	HH	HH
366	9	1.14613	6.3333	0.80163	11.3333	13.3496	0.05228	0.0615	0.2064	0.454313	0.4239	11.2667	15.6333	0.2301	1.18	816.85	331.52	1.2821	-0.27047	-0.887575	HH	HH	HH	HH	HH	HH	HH	HH	HH	HH	HH	HH	HH	HH	HH	HH	HH	HH	HH	HH	HH	HH	HH	HH	HH	HH	HH	HH	HH
368	12	1.23045	7	0.845098	14.3333	12.3802	0.04686	0.0863	0.3871	0.622174	0.4671	17.4667	22.2667	0.1841	1.8413	1068.29	299.26	5.22501	0.477244	-1.94511	FF	FF	FF	FF	FF	FF	FF	FF	FF	FF	FF	FF	FF	FF	FF	FF	FF	FF	FF	FF	FF	FF	FF	FF	FF	FF	FF	FF	FF
369	3.6667	0.937854	5.6667	0.75333	8.3333	11.4343	0.05817	0.0608	0.1638	0.404722	0.4406	14.1	21.2	0.2719	1.0457	688.82	441.22	0.586816	-0.332113	1.12172	FF	FF	FF	FF	FF	FF	FF	FF	FF	FF	FF	FF	FF	FF	FF	FF	FF	FF	FF	FF	FF	FF	FF	FF	FF	FF	FF	FF	FF
372	5.3333	1.01424	6.6667	0.823911	10.3333	13.662	0.04702	0.04813	0.1434	0.378682	0.4489	9.1667	12.4333	0.2537	1.012	641.46	391.46	-0.668754	-0.799519	0.866051	HH	HH	HH	HH	HH	HH	HH	HH	HH	HH	HH	HH	HH	HH	HH	FF	FF	FF	HH	HH	HH	HH	HH	HH	HH	HH	HH	HH	HH
379	2.6667	0.884608	6.6667	0.823911	7.6667	11.9054	0.04556	0.03303	0.0579	0.240624	0.4884	4.7333	12.5667	0.3654	0.727	396.02	491.81	-3.55805	-0.0931049	4.32526	HH	HH	HH	HH	HH	HH	HH	HH	HH	HH	HH	HH	HH	HH	HH	FF	FF	FF	HH	HH	HH	HH	HH	HH	HH	HH	FF	FF	FF
380	8	1.11394	5.3333	0.726996	8.3333	9.7657	0.05562	0.05353	0.1712	0.413763	0.4886	14.4333	17.3333	0.2377	0.9613	520.12	343.64	-0.120527	1.67937	-1.04591	FH	FH	FH	FH	FH	FH	FH	HH	HH	HH	HH	HH	HH	HH	HH	HH	HH	HH	HH	HH	HH	HH	HH	HH	HH	HH	HH	HH	HH
381	5.7955	1.03324	9	0.954243	11.5	12.8558	0.0539	0.0686	0.2148	0.463465	0.43	13	17.7	0.2482	1.267	887.38	425.97	2.12554	-0.557062	1.40429	HH	HH	HH	HH	HH	HH	HH	HH	HH	HH	HH	HH	HH	HH	HH	FF	FF	FF	HH	HH	HH	HH	HH	HH	HH	HH	HH	FH	FF
382	4	0.954243	4.3333	0.636819	8	9.6042	0.04792	0.04057	0.1121	0.334813	0.531	13.3667	17.7667	0.2759	0.8483	394.86	418.02	-1.81476	1.07742	1.02035	HH	HH	HH	HH	HH	HH	HH	HH	HH	HH	HH	HH	HH	HH	HH	HH	FF	FF	FF	FF	FF	FF	FF	FF	FF	FH	FH	FH	FH
383	13	1.25527	8	0.90309	15	8.9852	0.05897	0.1437	0.3501	0.591692	0.4901	18.3333	22.7667	0.2902	2.4373	1299.17	369.6	6.90653	3.25929	1.47652	HH	HH	HH	HH	HH	HH	HH	HH	HH	HH	HH	HH	HH	HH	HH	HH	FF	FF	FF	FF	FF	FF	FF	FF	FF	FF	FF	FF	FF
385	7	1.07918	6	0.778151	7.6667	14.9884	0.04926	0.03087	0.1053	0.3245	0.4271	12.9667	10.8667	0.228	0.6307	459.95	387	-1.77617	-1.66838	-0.684238	HH	HH	HH	HH	HH	HH	HH	HH	HH	HH	HH	HH	HH	HH	HH	HH	FF	FF	FF	HH	HH	HH	HH	HH	HH	HH	HH	HH	HH
388	7.2955	1.08975	3.5	0.544068	6	13.1619	0.04035	0.0251	0.06675	0.25836	0.4933	12.05	13.25	0.2733	0.6245	324.87	442.07	-3.44729	-1.14839	0.584228	HH	HH	HH	HH	HH	HH	HH	HH	HH	HH	FF	FF	FF	FF	FF	FF	FF	FF	FF	FF	FF	FF	FF	FF	FF	FF	FF	FF	FF
390	7	1.07918	4.6667	0.66901	7.6667	13.8115	0.05491	0.0624	0.213	0.461519	0.4103	14.1667	17.6667	0.2288	1.1303	858.76	375.68	1.05032	-1.29014	-0.992853	HH	HH	HH	HH	HH	HH	HH	HH	HH	HH	HH	HH	HH	HH	HH	HH	HH	HH	HH	HH	HH	HH	HH	FF	FF	FF	FF	FF	FF
391	7	1.07918	6.6667	0.823911	8	11.09	0.06159	0.07203	0.1779	0.421782	0.4344	12.1	17.1	0.2898	1.1713	800.17	368.78	0.864304	1.08723	0.534633	FH	FH	FH	FH	FF	FF	FF	FF	FF	FF	FF	FF	FF	FF	FF	FF	FF	FF	FF	FF	FF	FF	FF	FF	FF	FF	FF	FF	FF
394	2.3333	0.865299	5.6667	0.75333	8	10.0242	0.05302	0.04203	0.1134	0.336749	0.4925	9.6667	13.8	0.2717	0.7907	429.72	386.69	-1.97291	1.1524	0.978444	FF	FF	FF	FF	FF	FF	FF	FF	FF	FF	FF	FF	FF	FF	FF	FF	FF	FF	FF	FF	FF	FF	FH	FH	FH	FH	FH	FH	FH
402	10.9024	1.20146	4.5	0.653213	8.5	11.7278	0.05405	0.05115	0.1163	0.341028	0.4499	9.3	13.95	0.3194	0.9455	598.29	378.3	-1.33057	0.857486	0.593545	FF	FF	FF	FF	FF	FF	FF	FF	FF	HH	HH	HH	HH	HH	HH	HH	HH	HH	HH	HH	HH	FF	FF	FF	FF	FF	FF	FF	FF
403	4.3333	0.970035	4.3333	0.636819	7.6667	10.4035	0.05694	0.03877	0.1213	0.348281	0.4681	12.6667	13.6667	0.2516	0.6673	394.86	369.55	-1.82244	0.872784	-0.425046	HH	HH	HH	HH	HH	HH	HH	HH	HH	HH	HH	HH	HH	HH	HH	HH	HH	HH	HH	HH	HH	HH	HH	HH	HH	HH	HH	HH	HH
407	5	1	6.6667	0.823911	11.3333	11.0333	0.0559	0.06107	0.2001	0.447325	0.458	17.9	16.6667	0.2328	1.094	678.15	377.16	1.45012	0.505755	-0.0598124	HH	HH	HH	HH	HH	HH	HH	HH	HH	HH	HH	HH	HH	HH	HH	HH	HH	HH	HH	HH	HH	HH	HH	HH	HH	HH	HH	HH	HH
411	2.6667	0.884608	7	0.845098	9	13.962	0.04616	0.04143	0.1046	0.323419	0.4456	11.7	15.8	0.2622	0.8903	580.12	471.06	-0.991231	-1.95992	2.00065	HH	HH	HH	HH	HH	HH	HH	HH	HH	HH	HH	HH	HH	HH	HH	FF	FF	FF	FF	FF	FF	FF	FF	FF	FF	FF	FF	FF	FF
418	11.4024	1.21491	8	0.90309	15	10.6585	0.04816	0.0881	0.2522	0.502195	0.4973	18.5	17.6	0.2588	1.84	943.33	369.6	3.81455	1.66538	0.844056	HH	HH	HH	HH	HH	HH	HH	HH	HH	HH	HH	HH	HH	HH	HH	HH	HH	HH	HH	HH	HH	HH	HH	HH	HH	HH	HH	HH	HH
421	7.7955	1.10706	5	0.69897	8	12.8087	0.04865	0.0702	0.2637	0.513517	0.4533	17.7	21.15	0.2058	1.432	890.49	353.12	2.29275	-0.740353	-1.5267	HH	HH	HH	HH	HH	HH	HH	HH	HH	HH	HH	HH	HH	HH	HH	HH	HH	HH	HH	HH	HH	HH	HH	HH	HH	HH	HH	HH	HH
425	6.6667	1.06695	8	0.90309	10.6667	12.4784	0.05937	0.09343	0.3479	0.58983	0.4146	22.2	23.4	0.2111	1.5707	1151.61	387.08	5.31329	-0.547712	-0.54622	FF	FF	FF	FF	FF	FF	FF	FF	FF	FF	FF	FF	FF	FF	FF	FF	FF	FF	FF	FF	FF	FF	FF	FF	FF	FF	FF	FF	FF
426	5	1	8.3333	0.920817	11.6667	12.9274	0.05632	0.05973	0.1791	0.423202	0.4187	13.2333	14.8333	0.2514	1.0597	774.04	398.52	1.23726	-0.441218	0.93931	FF	FF	FF	FF	FF	FF	FF	FF	HH	HH	HH	HH	HH	HH	HH	HH	HH	HH	HH	HH	HH	HH	HH	HH	HH	HH	HH	HH	HH
427	5.8522	1.03552	7	0.845098	10.75	12.9771	0.05585	0.06655	0.1948	0.441362	0.4255	11.9	18.225	0.2646	1.2105	808.52	426.17	1.37428	-0.625518	1.22402	FF	FF	FF	FF	FF	FF	FF	FF	FF	FF	FF	FF	FF	FF	FF	FF	FF	FF	FF	FF	FF	FF	FF	FF	FF	HH	HH	HH	HH
434	6	1.04139	9.3333	0.970035	11.3333	14.3853	0.05017	0.07437	0.2513	0.501298	0.4195	20.3	17.9667	0.2226	1.462	1025.06	379.17	3.62884	-1.40835	0.164772	HH	HH	HH	HH	HH	HH	HH	HH	HH	HH	HH	HH	HH	HH	HH	HH	HH	HH	HH	HH	HH	HH	HH	HH	HH	HH	HH	HH	HH
439	10.302	1.18475	5	0.69897	6	9.3824	0.06072	0.02675	0.0868	0.294618	0.475	8.35	9.45	0.2336	0.4375	250.83	281.25	-3.20206	2.72254	-2.42627	HH	HH	HH	HH	HH	HH	HH	HH	HH	HH	HH	HH	HH	HH	HH	HH	HH	HH	HH	HH	HH	HH	HH	FH	FH	FH	FH	FH	FH
441	1.6667	0.823911	6.3333	0.80163	6.6667	17.9457	0.04853	0.03163	0.08327	0.288565	0.383	8.0667	14.1333	0.2769	0.6537	565.54	412.08	-2.06111	-3.67912	0.992177	HH	FH	FH	FH	FH	FH	FH	HH	HH	HH	HH	HH	HH	HH	HH	FF	FF	FF	FF	FF	FF	FF	HH	HH	HH	HH	HH	HH	HH
447	10.3333	1.18564	4	0.60206	7.3333	14.1425	0.04176	0.02613	0.09897	0.314595	0.4705	14.9667	15.0333	0.2132	0.6547	362.44	333.75	-1.96817	-1.12147	-2.28593	FF	FF	FF	FF	FF	FF	FF	FF	FF	FF	FF	FF	FF	FF	FF	FF	FF	FF	FF	FF	FF	FF	FF	HH	HH	HH	HH	HH	HH
451	10.3333	1.18564	4.3333	0.636819	8.3333	10.1153	0.05541	0.04347	0.1589	0.398623	0.4771	14.7	15.9667	0.216	0.7827	437.72	307.73	-0.664652	1.57864	-2.45577	FH	FH	FH	FH	FH	FH	FF	FF	FF	FF	FF	FF	FF	FF	FF	FF	FF	FF	FF	FF	FF	FF	FF	FF	HH	HH	HH	HH	HH
458	5.3333	1.01424	5.3333	0.726996	9	12.6116	0.05184	0.05573	0.1891	0.434856	0.4446	14.5	19.9667	0.2288	1.062	711.03	389.86	0.780134	-0.83398	-0.383314	HH	HH	HH	HH	HH	HH	HH	HH	HH	HH	HH	HH	HH	HH	HH	HH	HH	HH	HH	HH	HH	HH	HH	HH	HH	HH	HH	HH	HH
463	7.3333	1.09108	3.6667	0.564275	4.6667	11.1631	0.05326	0.02517	0.07517	0.274171	0.4646	8.7333	11.4	0.2499	0.469	287.48	335.36	-3.64761	0.725266	-1.44648	HH	HH	HH	HH	HH	HH	HH	HH	HH	HH	HH	HH	HH	HH	HH	HH	HH	HH	HH	HH	HH	HH	HH	HH	HH	HH	HH	HH	HH
464	3	0.90309	7	0.845098	8.6667	11.3828	0.05337	0.0573	0.1556	0.394462	0.4594	9.7	14.6	0.2734	1.065	645.86	356.05	-0.366978	0.677747	0.865589	FF	FF	FF	FF	FF	FF	FF	FF	FF	FF	FF	FF	FF	FF	FF	FF	FF	HH	HH	HH	HH	HH	HH	HH	HH	HH	HH	HH	HH
473	8.3333	1.12494	4.3333	0.636819	7.6667	10.313	0.05463	0.04077	0.1181	0.343657	0.4761	9.0667	13.5	0.2566	0.7427	418.92	353.47	-2.04026	1.39204	-0.685468	HH	HH	HH	HH	HH	HH	HH	HH	HH	HH	HH	HH	HH	HH	HH	HH	HH	HH	HH	HH	HH	HH	HH	HH	HH	HH	HH	HH	HH
476	7.3333	1.09108	7.3333	0.865299	12.6667	13.7003	0.05397	0.09053	0.2547	0.504678	0.4203	14.7333	22.0333	0.2637	1.7563	1277.33	372.77	4.27439	-0.662893	0.800504	HH	HH	HH	HH	HH	HH	HH	HH	HH	HH	HH	HH	HH	HH	HH	HH	HH	HH	FF	FF	FF	FF	FF	FF	FF	FF	FF	FF	FF
477	5.6667	1.02803	4.6667	0.66901	11	13.4683	0.05274	0.0766	0.2293	0.478853	0.4233	17.7	18.2333	0.2582	1.49	1033.4	402.84	2.53917	-1.21354	0.466762	HH	HH	HH	HH	HH	HH	HH	HH	HH	HH	HH	HH	HH	HH	HH	HH	HH	HH	HH	HH	FH	FF	FF	FF	FF	FF	FF	FF	FF
479	6.7955	1.07172	6	0.778151	4	13.9638	0.04517	0.02955	0.0996	0.315595	0.4549	7.95	9.05	0.2287	0.6615	413.26	381.56	-3.19265	-1.03732	-0.558284	FF	FF	FF	FF	FF	FF	FF	FH	FH	FH	FH	HH	HH	HH	HH	HH	HH	FH	FH	FH	FH	FH	FH	FH	FH	FH	FH	FH	FH
481	5	1	8.3333	0.920817	11	12.6015	0.05381	0.07557	0.2464	0.496387	0.435	13.4	19.5667	0.2334	1.4237	934.8	391.82	2.71111	-0.38407	0.683247	HH	HH	HH	HH	HH	HH	HH	HH	HH	HH	FF	FF	FF	FF	FF	FF	FF	FF	FF	FF	FF	FF	FF	FF	FF	FF	FF	FF	FF
482	4.6667	0.985278	5.6667	0.75333	9	12.0474	0.05308	0.05553	0.1728	0.415692	0.4499	14.5333	17.6	0.2437	1.048	669.39	405.32	0.37727	-0.438909	0.267335	HH	HH	HH	HH	HH	HH	HH	HH	HH	HH	HH	HH	HH	HH	HH	HH	HH	HH	HH	HH	HH	HH	HH	HH	HH	HH	FF	FF	FF
491	11	1.20412	9	0.954243	12	13.1721	0.05173	0.05523	0.1858	0.431045	0.4355	12.0333	17	0.2322	1.0607	718.32	403.49	1.34726	-0.297581	0.24831	FF	FF	FF	FF	HH	HH	HH	HH	HH	HH	HH	HH	HH	HH	HH	HH	HH	HH	HH	HH	HH	FF	FF	FF	FF	FF	FF	FF	FF
668	6.3333	1.05436	6	0.778151	10	8.8887	0.06047	0.05333	0.1303	0.360971	0.4889	9.8	12.2	0.2943	0.8773	487.91	371.95	-1.16856	2.67417	0.985842	HH	HH	HH	HH	HH	HH	HH	HH	HH	HH	HH	HH	HH	HH	HH	HH	HH	HH	HH	HH	HH	HH	HH	HH	HH	HH	HH	HH	HH
671	13.4024	1.26487	6	0.778151	7.5	11.6799	0.05098	0.05785	0.1817	0.426263	0.4704	14.55	14.45	0.2416	1.165	671.9	374.39	0.209131	0.801848	-0.912539	HH	HH	HH	HH	HH	HH	HH	HH	HH	HH	HH	HH	HH	HH	HH	HH	HH	HH	HH	HH	HH	HH	HH	HH	HH	HH	HH	HH	HH
675	10.2955	1.18456	6	0.778151	6.5	10.5455	0.05719	0.03205	0.09085	0.301413	0.4606	7.6	9.65	0.2541	0.5725	343.4	471.28	-2.96446	0.809034	0.730314	HH	HH	HH	HH	HH	HH	HH	HH	HH	HH	HH	HH	HH	HH	HH	HH	HH	HH	HH	HH	HH	HH	HH	HH	HH	HH	HH	HH	HH
679	4.6667	0.985278	5.3333	0.726996	9.6667	13.9552	0.05805	0.07067	0.2179	0.466798	0.3987	17.8	15.1667	0.2538	1.1797	978.81	376.62	1.8988	-1.21702	-0.119426	HH	HH	HH	HH	HH	HH	HH	HH	HH	HH	HH	HH	HH	HH	HH	HH	HH	HH	HH	HH	HH	HH	HH	HH	HH	HH	HH	HH	HH
681	8.3333	1.12494	4	0.60206	8	12.1347	0.05464	0.04337	0.1286	0.358608	0.4396	12.8667	14.7667	0.2532	0.792	528.64	394.42	-1.1551	-0.229134	-0.546933	FF	FF	FF	FF	FF	FF	FF	FF	FF	FF	FF	FF	FF	FF	FF	FF	FF	FF	FF	FF	FF	FF	FF	FF	FF	FF	FF	FF	FF
682	2.3333	0.865299	6	0.778151	9	11.9468	0.05291	0.0546	0.1397	0.373765	0.4529	11	14.8667	0.2949	0.9643	649.63	376.55	-0.635549	0.121555	1.29921	FF	FF	FF	FF	FF	FF	FF	FF	FF	FF	FF	FF	FF	FF	FF	FF	FF	FF	FF	FF	FF	FF	FH	FH	FH	FH	FH	FH	FH
689	10	1.17609	6	0.778151	10.3333	12.9428	0.05143	0.062	0.1826	0.427317	0.4353	12.6667	15.4	0.2523	1.2047	791.64	423.4	0.826142	-0.55401	0.482344	HH	HH	HH	HH	HH	HH	HH	HH	HH	HH	FF	FF	FF	FF	FF	FF	FF	FF	FF	FF	FF	FF	FF	FF	FF	FF	FF	FF	FF
691	4.3333	0.970035	5.3333	0.726996	8.3333	13.5182	0.05324	0.04643	0.125	0.353553	0.4261	10.1	15.9333	0.2647	0.8353	605.53	430.04	-0.991452	-1.30396	0.880853	FF	FF	FF	FF	FF	FF	FF	FF	FF	FF	FF	FF	FF	FF	FF	FF	FF	HH	HH	HH	HH	HH	HH	HH	HH	HH	HH	HH	HH
707	4	0.954243	4	0.60206	6.6667	12.8318	0.04642	0.03257	0.08227	0.286827	0.4672	10.4333	11.2	0.2893	0.6987	424.98	426.39	-3.04895	-0.839137	1.17208	FF	FF	FF	FF	FF	HH	HH	HH	HH	HH	HH	HH	HH	HH	HH	HH	HH	HH	HH	HH	HH	HH	HH	HH	HH	HH	HH	HH	HH
718	12	1.23045	7.3333	0.865299	7.6667	11.6335	0.05599	0.06817	0.2361	0.485901	0.4453	12.9	15.9333	0.2276	1.2153	806.42	356.12	1.35426	0.895865	-1.07778	FF	FF	FF	FF	FF	FF	FF	FF	FF	FF	FF	HH	HH	HH	HH	HH	HH	HH	HH	HH	HH	HH	HH	HH	HH	HH	HH	HH	HH
727	2	0.845098	6.3333	0.80163	7	11.8485	0.04859	0.04357	0.1138	0.337343	0.4704	11.4667	15.6667	0.2774	0.897	516.44	450.06	-1.52659	-0.603272	1.87361	FH	FH	FH	FH	FH	FH	FH	FH	FF	FF	FF	FF	FF	FF	FF	FF	FF	FF	FF	FF	FF	FF	FF	FF	FF	FF	FF	FF	FF
728	10.6667	1.19498	4	0.60206	6.3333	15.3768	0.05106	0.04115	0.1396	0.373631	0.3948	14.4333	18.8667	0.2112	0.714	604.2	360.93	-0.461406	-2.3173	-2.46259	HH	HH	HH	HH	HH	HH	FF	FF	FF	FF	FF	FF	FF	FF	FF	FF	FF	FF	FF	FF	FF	FF	FF	FF	FF	FF	FF	FF	FF
729	14.3959	1.28771	5	0.69897	8	13.387	0.0525	0.0399	0.0971	0.311609	0.4286	9.1	12	0.2912	0.76	545.9	414.01	-1.85552	-0.232794	0.0901051	FF	FF	FF	FF	FF	FF	FF	FF	FF	FF	FF	FF	FF	FF	FF	FF	HH	HH	HH	HH	HH	HH	HH	HH	HH	HH	HH	HH	HH
730	4.6667	0.985278	4.3333	0.636819	6.6667	15.8782	0.0462	0.03117	0.09963	0.315642	0.4176	11.6	14.5667	0.2399	0.681	495.81	406.65	-2.00345	-2.82515	-0.336787	HH	HH	HH	HH	HH	HH	HH	HH	HH	FF	FF	FF	FF	FF	FF	FF	FF	FF	FF	FF	FF	FF	FF	FF	FF	FF	FF	FF	HH
755	11.6667	1.22185	7	0.845098	8.6667	10.2051	0.05873	0.06083	0.1979	0.44486	0.4682	11.7	20.3667	0.2253	1.1063	667.44	336.91	1.06511	1.80752	-1.40726	HH	FF	FF	FF	FF	FF	FF	FF	FF	FF	FF	FF	FF	FF	FF	FF	FF	FF	FF	FF	FF	FF	FF	FF	FF	FF	FF	FF	FF
758	8.3333	1.12494	4.6667	0.66901	7.3333	13.2742	0.05178	0.04257	0.1486	0.385487	0.431	12.3	16.9	0.2225	0.8153	562.51	395.06	-0.75659	-1.11805	-1.05071	HH	HH	HH	HH	HH	HH	HH	HH	HH	HH	HH	HH	HH	HH	HH	HH	HH	FF	FF	FF	FF	FF	FF	FF	FF	FF	FF	FF	FF
760	4.6667	0.985278	6.6667	0.823911	11	14.0044	0.05486	0.0506	0.1732	0.416173	0.4081	11.5667	12.5667	0.2272	0.9173	710.48	382.59	0.285353	-1.16312	0.000237688	FF	FF	HH	HH	HH	HH	HH	HH	HH	HH	HH	HH	HH	HH	HH	HH	HH	HH	HH	HH	HH	HH	HH	HH	HH	HH	HH	HH	HH
770	5.6667	1.02803	4.6667	0.66901	9.6667	12.9245	0.05026	0.04603	0.1922	0.438406	0.4436	11.9333	14.9333	0.228	0.911	590.35	383.35	-0.352306	-0.801582	-0.468033	HH	HH	HH	HH	HH	HH	HH	HH	HH	FF	FF	FF	FF	FF	FF	FF	FF	FF	FF	FF	FF	FF	FF	FF	FF	FF	FF	HH	HH
777	6	1.04139	8	0.90309	12.3333	12.6688	0.0455	0.05447	0.1584	0.397995	0.4699	10.1	14.9667	0.263	1.1897	670.29	396.44	0.339697	-0.11096	1.51458	HH	HH	HH	HH	HH	HH	HH	HH	HH	HH	HH	HH	HH	HH	HH	HH	HH	HH	HH	FF	FF	FF	FF	FF	FF	FF	FF	FF	FF
781	1.6667	0.823911	4	0.60206	5.3333	9.6583	0.0434	0.02867	0.05647	0.237634	0.5572	6.1	9.9667	0.3355	0.6533	280.22	393.55	-4.82768	1.77056	2.2612	FH	FH	FH	FH	FH	FH	FH	FH	FH	FH	FH	FH	FF	FF	FF	FF	FF	FF	FF	FF	FF	HH	HH	HH	HH	HH	HH	HH	HH
782	8	1.11394	7.3333	0.865299	8.3333	13.9706	0.04843	0.05283	0.2021	0.449555	0.4338	11.6333	15.3	0.2063	1.089	726.94	301.46	0.609246	-0.592443	-1.69392	HH	HH	HH	HH	HH	HH	HH	HH	HH	HH	HH	HH	HH	HH	HH	HH	HH	HH	HH	HH	FH	FH	FH	FH	FH	FH	FH	FH	FH
791	10	1.17609	5.3333	0.726996	8.6667	13.9221	0.04689	0.04613	0.1365	0.369459	0.4443	14.3667	13.4333	0.2551	1.008	630.31	499.36	-0.66961	-1.71648	1.15832	HH	HH	HH	HH	HH	HH	HH	HH	HH	HH	HH	HH	HH	HH	HH	HH	HH	HH	FF	FF	FF	FF	FF	FF	FF	FF	FF	FF	FF
799	4.3333	0.970035	3.3333	0.522874	7	14.7029	0.04117	0.034	0.1044	0.32311	0.459	13.2667	17.3667	0.247	0.826	498.78	433.37	-1.84501	-2.5278	0.209989	HH	HH	HH	HH	HH	HH	HH	HH	HH	HH	HH	HH	HH	HH	FF	FF	FF	FF	FF	FF	FF	FF	FF	FF	FF	FF	FF	FF	FF
802	4	0.954243	4.6667	0.66901	6.3333	11.1636	0.05329	0.03963	0.09697	0.3114	0.4631	8.5	12.3333	0.2887	0.7367	437.39	391.8	-2.64625	0.459125	0.800042	FF	FF	FF	FF	FF	FF	FF	FF	FF	FF	HH	HH	HH	HH	HH	HH	HH	HH	HH	HH	HH	HH	HH	HH	HH	HH	HH	HH	HH
814	4.6667	0.985278	7	0.845098	10	11.4533	0.06109	0.068	0.2059	0.453762	0.4281	10.8667	18.9333	0.2548	1.1087	766.12	393.3	1.29308	0.362882	0.616205	FH	FH	FH	FH	FH	FH	FH	FF	FF	FF	FF	FF	FF	HH	HH	HH	HH	HH	HH	HH	HH	HH	HH	HH	HH	HH	HH	HH	HH
816	6.6667	1.06695	7.3333	0.865299	13	10.3738	0.06056	0.056	0.248	0.497996	0.4509	14.4667	18.3667	0.1983	0.9367	593.16	380.73	1.77996	0.972313	-0.694823	HH	HH	HH	HH	HH	HH	HH	HH	HH	HH	FF	FF	FF	FF	FF	FF	FF	FF	FF	FF	FF	FF	FF	FF	FF	FF	FF	FF	FF
819	4.6667	0.985278	5.3333	0.726996	4.3333	14.6598	0.05544	0.0241	0.051	0.225832	0.4002	4.7333	8.1	0.3376	0.4457	373.87	411.79	-4.26012	-1.18865	1.51851	FF	FF	FF	HH	HH	HH	HH	HH	HH	FF	FF	FF	FF	FF	FF	FF	FF	FF	FF	FF	FF	FF	FF	FF	FF	FF	FF	FF	FF
825	5.3333	1.01424	7.3333	0.865299	10	8.1735	0.05388	0.0494	0.1278	0.357491	0.5418	9.0667	12.1667	0.2769	0.914	396.74	367.12	-1.53157	3.26528	1.26115	FF	FF	FF	FF	FF	FF	FF	FF	FF	FF	FF	FF	FF	FF	FF	FF	FF	FF	FF	FF	FF	FF	HH	HH	HH	HH	HH	HH	HH
831	5	1	7.3333	0.865299	12.3333	12.2298	0.05009	0.06333	0.1912	0.437264	0.4533	14.1667	19.1	0.2491	1.2827	778.38	343.7	1.77671	0.0433449	0.261141	HH	HH	HH	HH	HH	FF	FF	FF	FF	FF	FF	FF	FF	FF	FF	FF	FF	FF	FF	FF	FF	FF	FF	FF	FF	FF	FF	FF	FF
834	1	0.778151	7.6667	0.884608	11	12.9755	0.05474	0.08673	0.2734	0.522877	0.4248	17.7667	18.1333	0.2519	1.5793	1119.24	440.66	3.49339	-1.18843	1.90101	FF	FF	FF	FF	FF	FF	FF	FF	FF	FF	FF	FF	FF	FF	FF	FF	FF	FF	FF	FF	FF	FF	FF	FF	FF	HH	HH	HH	HH
841	15	1.30103	6.3333	0.80163	10	14.6154	0.05344	0.05533	0.2777	0.526972	0.4049	16.5667	19.1333	0.1664	1.038	813.99	357.05	2.41168	-1.30423	-3.00608	HH	HH	HH	HH	HH	HH	HH	HH	HH	HH	HH	HH	HH	HH	HH	HH	HH	HH	HH	HH	HH	HH	HH	HH	HH	HH	HH	HH	HH
853	9.6667	1.16633	7.6667	0.884608	12.3333	14.2949	0.05119	0.06457	0.2352	0.484974	0.4198	14.5	18.3333	0.2186	1.2633	885.15	372.89	2.5173	-1.05229	-0.509067	HH	HH	HH	HH	HH	HH	HH	HH	HH	HH	HH	HH	HH	HH	HH	HH	HH	HH	HH	HH	HH	HH	HH	HH	HH	HH	HH	HH	HH
854	16.3959	1.33033	6	0.778151	10	15.2188	0.04766	0.0478	0.1449	0.380657	0.4228	14.2	16.5	0.2481	1.003	741.55	432.63	0.424368	-1.60411	-0.451479	HH	FH	FH	FH	FH	FH	FH	FF	FF	FF	FF	HH	HH	HH	HH	HH	HH	HH	HH	HH	HH	HH	HH	HH	HH	HH	HH	HH	HH
862	4	0.954243	5.3333	0.726996	8.3333	15.1747	0.04647	0.0345	0.116	0.340588	0.4262	10.5333	13.2	0.2298	0.738	523.33	384.88	-1.58582	-2.16093	-0.256297	FF	FF	FF	FF	FF	FF	FF	FF	FF	FF	FF	FF	FF	FF	FF	HH	HH	HH	HH	HH	HH	HH	HH	HH	HH	HH	HH	HH	HH
867	10.6667	1.19498	4.6667	0.66901	6	14.411	0.05075	0.04233	0.1143	0.338083	0.4304	9.8	17.5	0.263	0.8027	537.78	401.65	-1.47475	-1.25772	-0.54004	FF	FF	FF	FF	FF	FF	FF	FF	HH	HH	HH	HH	HH	HH	HH	HH	HH	HH	HH	HH	HH	HH	HH	HH	HH	HH	FH	FH	FH
868	7	1.07918	5	0.69897	7.6667	12.1409	0.04931	0.04717	0.1266	0.355809	0.4655	11.7	15.6667	0.2708	0.9487	567.57	371.72	-1.10646	0.0444801	0.0431458	HH	HH	HH	HH	HH	FH	FH	FH	FH	FH	FH	FH	FH	FH	FH	FH	FH	FH	FH	FH	FH	FF	FF	FF	FF	FF	FF	FF	FF
880	7.3959	1.09328	4	0.60206	9	16.0596	0.04621	0.0372	0.1957	0.44238	0.4183	14.5	18.2	0.1597	0.805	608.38	299.67	0.203262	-2.47904	-3.4558	FF	HH	HH	HH	HH	HH	HH	HH	HH	HH	HH	HH	HH	HH	HH	HH	HH	HH	HH	HH	HH	HH	HH	HH	HH	HH	HH	HH	HH
881	5.3333	1.01424	6	0.778151	13	9.892	0.06174	0.0814	0.2828	0.531789	0.4562	17.8333	22.8333	0.2293	1.336	793.1	321.24	3.4749	1.54544	-0.945367	FF	FF	FF	FF	FF	FF	FF	FF	FF	FF	FF	FF	FF	FF	FH	FH	FH	FH	FH	FH	FH	FH	FH	FH	FH	HH	HH	HH	HH
898	12.2955	1.23793	7.5	0.875061	9.5	15.4968	0.0452	0.06835	0.276	0.525357	0.4342	17.05	19.2	0.2052	1.574	1085.61	387.76	3.16575	-1.78968	-0.919583	HH	HH	HH	HH	HH	HH	HH	HH	HH	HH	HH	HH	HH	HH	HH	HH	HH	HH	HH	HH	HH	HH	HH	HH	HH	HH	HH	HH	HH
906	7.6667	1.10266	4.3333	0.636819	7.3333	15.3919	0.05117	0.04503	0.1756	0.419047	0.4031	12.6	20.2333	0.2048	0.8817	693.12	368.43	0.15383	-2.39847	-1.87084	HH	HH	HH	HH	HH	HH	HH	HH	HH	HH	HH	HH	HH	HH	HH	HH	HH	HH	HH	HH	HH	HH	HH	HH	HH	HH	HH	FF	FF
1000	9.1022	1.14929	6.25	0.79588	14	10.1984	0.05664	0.1385	0.4742	0.688622	0.4634	21.175	30.775	0.2236	2.4318	1365.43	325.62	8.40537	1.45821	-0.755933	FF	FF	FF	FF	FF	FF	FF	FF	FF	FF	FF	FF	FF	FF	FF	FF	FF	FF	FF	FF	FF	FF	FF	FF	FF	FF	FF	FF	FF
2000	4	0.954243	5	0.69897	8.3333	13.3741	0.05089	0.05077	0.1409	0.375366	0.4366	11.6333	14.2333	0.2671	0.9797	674.78	382.77	-0.70535	-0.913221	0.439494	HH	HH	HH	HH	HH	HH	HH	HH	HH	HH	HH	HH	HH	HH	HH	HH	HH	HH	HH	HH	HH	HH	HH	HH	HH	HH	HH	HH	HH
[truncated: 693 more columns]
